# Supplementary material for: Using neural networks for reducing the dimensions of single-cell RNA-Seq data
Source: PubMed Central journal article supplement — Nucleic Acids Res. 2017 Jul 31;45(17):e156. doi: 10.1093/nar/gkx681 (PMC5737331; doi:10.1093/nar/gkx681), 2017-07-31
Supplement: gkx681_supp.pdf [file gkx681_supp.pdf]

# Supplement to Using Neural Networks for Reducing the Dimensions of Single-Cell RNA-Seq Data

Chieh Lin <sup>1,\*</sup>, Siddhartha Jain <sup>2</sup>, Hannah Kim <sup>3</sup> and Ziv Bar-Joseph <sup>1, 3,\*</sup>

1. Machine Learning Department, School of Computer Science, Carnegie Mellon University
2. Computer Science Department, School of Computer Science, Carnegie Mellon University
3. Computational Biology Department, School of Computer Science, Carnegie Mellon University

\*To whom correspondence should be addressed.

## 1 Supplementary Methods

### 1.1 Details of clustering methods we compared to

#### 1.1.1 SINCERA

We modify the demo.R file of SINCERA to perform clustering on whole dataset (without dimensionality reduction). The data processing steps before clustering are removed since they are not applicable to our dataset. We also set the parameters for the clustering as the default parameter in demo.R.

#### 1.1.2 SNN-Cliq

We use default parameter for SNN-Cliq clustering on whole dataset (without dimensionality reduction).

#### 1.1.3 pcaReduce

We apply pcaReduce to the whole dataset. We set the starting reduced dimension to 3 times the number of cell types. Maximum probability is selected as the merge method.

#### 1.1.4 SIMLR

We use the python implementation of SIMLR with default parameters. The default parameter for the number of neighbors (30 neighbors) is not applicable when the number of cell is too low. In this case we set the number to be half of the number of input cells. redWe also try 20 or 40 neighbors for performance comparison.

## 2 Supplementary Tables

Supplementary Table 1: Summary of the 33 datasets

| No. | doi                           | data_accession# | #sample | #cell type | tissue/cell type       |
|-----|-------------------------------|-----------------|---------|------------|------------------------|
| 1   | 10.1038/nature12172           | GSE41265        | 18      | 1          | BMDC                   |
| 2   | 10.1186/gb-2013-14-4-r31      | GSE42268        | 77      | 9          | ESC                    |
| 3   | 10.1126/science.1245316       | GSE45719        | 317     | 24         | embryonic cells        |
| 4   | 10.1038/nbt.3102              | E-MTAB-2805     | 288     | 14         | ESC                    |
| 5   | 10.1186/s13059-016-0950-z     | GSE76483        | 159     | 14         | DRG                    |
| 6   | 10.1073/pnas.1402030111       | GSE47835        | 71      | 12         | ESC MEF                |
| 7   | 10.1038/nature13173           | GSE52583        | 201     | 26         | distal lung epithelium |
| 8   | 10.1016/j.stem.2014.11.005    | GSE55291        | 94      | 20         | iPS TTF ESC            |
| 9   | 10.1101/gr.177725.114         | GSE57249        | 56      | 20         | embryonic cells        |
| 10  | 10.1101/gr.171645.113         | GSE60297        | 174     | 16         | thymus TEC             |
| 11  | 10.1126/science.aaa1934       | GSE60361        | 3005    | 15         | celebral-cortex        |
| 12  | 10.15252/msb.20156198         | GSE60768        | 107     | 11         | ESC NSC                |
| 13  | 10.1038/nbt.3154              | GSE61470        | 15      | 14         | ESC PS NP HF           |
| 14  | 10.1038/cr.2015.149           | GSE63576        | 209     | 14         | DRG                    |
| 15  | 10.1016/j.cub.2015.01.034     | GSE64960        | 69      | 18         | granulosa              |
| 16  | 10.1016/j.cell.2015.04.044.   | GSE65525        | 8669    | 12         | ESC                    |
| 17  | 10.1016/j.devcel.2015.09.009. | GSE66202        | 91      | 19         | kidney                 |
| 18  | 10.1038/nbt.3443              | GSE70844        | 83      | 14         | neuron                 |
| 19  | 10.1016/j.cell.2015.11.009    | GSE75107        | 166     | 10         | CNS/Th17               |
| 20  | 10.1016/j.cell.2015.11.009    | GSE75108        | 136     | 9          | LN/Th17                |
| 21  | 10.1016/j.cell.2015.11.009    | GSE75109        | 139     | 17         | spleen LN/Th17         |
| 22  | 10.1016/j.cell.2015.11.009    | GSE75110        | 130     | 17         | spleen LN/Th17         |
| 23  | 10.1016/j.cell.2015.11.009    | GSE75111        | 151     | 17         | spleen LN/Th17         |
| 24  | 10.1038/ncomms10220           | GSE74923        | 194     | 31         | cancer                 |
| 25  | 10.1038/nature17997           | GSE67120        | 181     | 30         | HSC                    |
| 26  | 10.1186/s12974-016-0581-z     | GSE79510        | 45      | 21         | brain                  |
| 27  | 10.1038/celldisc.2016.10      | GSE70605        | 145     | 30         | embryonic cells        |
| 28  | 10.1182/blood-2016-05-716480  | GSE81682        | 1920    | 21         | HSC                    |
| 29  | 10.1172/JCI77378              | GSE66578        | 6       | 17         | lung                   |
| 30  | 10.1038/ni.3437               | GSE74596        | 203     | 19         | thymus                 |
| 31  | 10.1038/ni.3412               | GSE77029        | 64      | 22         | bone marrow            |
| 32  | 10.1016/j.devcel.2016.02.020  | GSE65924        | 70      | 16         | embryonic cells        |
| 33  | 10.1038/ncomms11075           | GSE70657        | 135     | 16         | HSC                    |

Supplementary Table 2: The datasets for each query cell type in the retrieval analysis

| cell type                      | dataset No.         |
|--------------------------------|---------------------|
| HSC (Hematopoietic stem cells) | 25 28 33            |
| 4cell                          | 3 9 27              |
| ICM (Inner Cell Mass)          | 9 27                |
| spleen                         | 21 22 23            |
| 8cell                          | 3 27                |
| neuron                         | 5 11 14 18 19 23 26 |
| zygote                         | 3 9 27              |
| 2cell                          | 3 9 27              |
| ESC (Embryonic stem cell)      | 4 6 8 12 13 16      |

Supplementary Table 3: Average clustering performance of different scoring metrics with 2 cell types in testing set for 20 clustering experiments (using different random initialization. Homo: homogeneity, Comp: Completeness, Vmes: v-measure, ARI: adjusted random index, AMI: adjusted mutual information, FM: Fowlkes-Mallows

| Feature                           | Homo         | Comp         | Vmes         | ARI          | AMI          | FM           | Average      |
|-----------------------------------|--------------|--------------|--------------|--------------|--------------|--------------|--------------|
| original                          | 0.889        | 0.891        | 0.889        | 0.891        | 0.881        | 0.973        | 0.902        |
| pca 2                             | 0.947        | 0.946        | 0.946        | 0.947        | 0.941        | 0.979        | 0.951        |
| tsne 2                            | 0.038        | 0.032        | 0.034        | 0.017        | 0.015        | 0.589        | 0.121        |
| ica 2                             | 0.785        | 0.795        | 0.787        | 0.787        | 0.78         | 0.959        | 0.816        |
| nmf 2                             | 0.649        | 0.656        | 0.648        | 0.632        | 0.629        | 0.892        | 0.684        |
| pca 5                             | 0.947        | 0.946        | 0.946        | 0.947        | 0.941        | 0.979        | 0.951        |
| tsne 5                            | 0.051        | 0.056        | 0.048        | 0.015        | 0.027        | 0.613        | 0.135        |
| ica 5                             | 0.569        | 0.603        | 0.577        | 0.57         | 0.559        | 0.89         | 0.628        |
| nmf 5                             | 0.735        | 0.745        | 0.736        | 0.73         | 0.717        | 0.925        | 0.765        |
| pca 10                            | 0.906        | 0.912        | 0.909        | 0.902        | 0.905        | 0.976        | 0.918        |
| tsne 10                           | 0.025        | 0.019        | 0.021        | -0.009       | 0.002        | 0.56         | 0.103        |
| ica 10                            | 0.201        | 0.29         | 0.214        | 0.19         | 0.183        | 0.806        | 0.314        |
| nmf 10                            | 0.612        | 0.604        | 0.6          | 0.586        | 0.574        | 0.872        | 0.641        |
| pca 50                            | 0.889        | 0.891        | 0.889        | 0.891        | 0.881        | 0.973        | 0.902        |
| nmf 50                            | 0.349        | 0.394        | 0.363        | 0.336        | 0.332        | 0.834        | 0.435        |
| pca 100                           | 0.889        | 0.891        | 0.889        | 0.891        | 0.881        | 0.973        | 0.902        |
| nmf 100                           | 0.302        | 0.357        | 0.315        | 0.291        | 0.28         | 0.796        | 0.39         |
| pcaReduce                         | 0.813        | 0.82         | 0.815        | 0.803        | 0.81         | 0.96         | 0.837        |
| SIMLR_20                          | 0.918        | 0.914        | 0.915        | 0.909        | 0.909        | 0.963        | 0.921        |
| SIMLR_30                          | 0.854        | 0.861        | 0.853        | 0.852        | 0.84         | 0.951        | 0.868        |
| SIMLR_40                          | 0.815        | 0.827        | 0.816        | 0.807        | 0.8          | 0.933        | 0.833        |
| SNN-Cliq                          | 0.0          | 0.0          | 0.0          | 0.0          | 0.0          | 0.0          | 0.0          |
| sincera_hc                        | 0.97         | 0.961        | 0.965        | 0.98         | 0.959        | 0.994        | 0.972        |
| Dense 1layer 100                  | 0.966        | 0.955        | 0.96         | 0.978        | 0.953        | 0.993        | 0.967        |
| Dense 1layer 796                  | 0.936        | 0.931        | 0.933        | 0.939        | 0.925        | 0.977        | 0.94         |
| Dense 2layer 796/100              | 0.961        | 0.949        | 0.955        | 0.975        | 0.947        | 0.992        | 0.963        |
| PPITF 1layer 696+100              | 0.956        | 0.943        | 0.949        | 0.968        | 0.941        | 0.989        | 0.958        |
| PPITF 2layer 696+100/100          | <b>0.976</b> | <b>0.966</b> | <b>0.971</b> | <b>0.984</b> | <b>0.965</b> | <b>0.996</b> | <b>0.976</b> |
| Dense 1layer 100 pretrain         | 0.934        | 0.919        | 0.926        | 0.935        | 0.917        | 0.976        | 0.935        |
| Dense 1layer 796 pretrain         | 0.936        | 0.931        | 0.933        | 0.939        | 0.925        | 0.977        | 0.94         |
| Dense 2layer 796/100 pretrain     | 0.97         | 0.961        | 0.965        | 0.98         | 0.959        | 0.994        | 0.972        |
| PPITF 1layer 696+100 pretrain     | 0.936        | 0.931        | 0.933        | 0.939        | 0.925        | 0.977        | 0.94         |
| PPITF 2layer 696+100/100 pretrain | 0.97         | 0.961        | 0.965        | 0.98         | 0.959        | 0.994        | 0.972        |

Supplementary Table 4: Average clustering performance of different scoring metrics with 6 cell types in testing set for 20 clustering experiments (using different random initialization. Homo: homogeneity, Comp: Completeness, Vmes: v-measure, ARI: adjusted random index, AMI: adjusted mutual information, FM: Fowlkes-Mallows

| Feature                           | Homo         | Comp         | Vmes        | ARI          | AMI          | FM           | Average      |
|-----------------------------------|--------------|--------------|-------------|--------------|--------------|--------------|--------------|
| original                          | 0.724        | 0.879        | 0.789       | 0.62         | 0.709        | 0.747        | 0.745        |
| pca 2                             | 0.828        | 0.853        | 0.839       | 0.755        | 0.809        | 0.822        | 0.818        |
| tsne 2                            | 0.229        | 0.218        | 0.222       | 0.131        | 0.166        | 0.321        | 0.215        |
| ica 2                             | 0.819        | 0.846        | 0.831       | 0.747        | 0.799        | 0.815        | 0.809        |
| nmf 2                             | 0.597        | 0.698        | 0.641       | 0.473        | 0.566        | 0.628        | 0.601        |
| pca 5                             | 0.746        | 0.881        | 0.804       | 0.65         | 0.732        | 0.766        | 0.763        |
| tsne 5                            | 0.053        | 0.054        | 0.053       | -0.002       | -0.005       | 0.229        | 0.064        |
| ica 5                             | 0.73         | 0.867        | 0.789       | 0.625        | 0.715        | 0.747        | 0.745        |
| nmf 5                             | 0.674        | 0.782        | 0.717       | 0.6          | 0.646        | 0.722        | 0.69         |
| pca 10                            | 0.738        | 0.885        | 0.8         | 0.63         | 0.723        | 0.756        | 0.755        |
| tsne 10                           | 0.062        | 0.056        | 0.059       | -0.001       | -0.0         | 0.2          | 0.063        |
| ica 10                            | 0.659        | 0.844        | 0.732       | 0.582        | 0.64         | 0.729        | 0.698        |
| nmf 10                            | 0.703        | 0.807        | 0.743       | 0.631        | 0.684        | 0.743        | 0.719        |
| pca 50                            | 0.746        | 0.864        | 0.798       | 0.65         | 0.733        | 0.759        | 0.758        |
| nmf 50                            | 0.538        | 0.714        | 0.607       | 0.459        | 0.511        | 0.637        | 0.578        |
| pca 100                           | 0.708        | 0.89         | 0.781       | 0.612        | 0.693        | 0.75         | 0.739        |
| nmf 100                           | 0.488        | 0.638        | 0.542       | 0.389        | 0.458        | 0.588        | 0.517        |
| pcaReduce                         | 0.769        | 0.848        | 0.803       | 0.693        | 0.753        | 0.78         | 0.774        |
| SIMLR_20                          | 0.767        | 0.743        | 0.754       | 0.609        | 0.719        | 0.699        | 0.715        |
| SIMLR_30                          | 0.79         | 0.796        | 0.791       | 0.671        | 0.75         | 0.752        | 0.758        |
| SIMLR_40                          | 0.798        | 0.784        | 0.79        | 0.641        | 0.753        | 0.727        | 0.749        |
| SNN-Cliq                          | 0.716        | 0.895        | 0.787       | 0.661        | 0.702        | 0.772        | 0.755        |
| sincera_hc                        | 0.773        | <b>0.931</b> | 0.838       | 0.738        | 0.761        | 0.827        | 0.811        |
| Dense 1layer 100                  | 0.854        | 0.851        | 0.852       | 0.769        | 0.824        | 0.827        | 0.83         |
| Dense 1layer 796                  | <b>0.858</b> | 0.862        | <b>0.86</b> | <b>0.783</b> | <b>0.835</b> | <b>0.839</b> | <b>0.839</b> |
| Dense 2layer 796/100              | 0.858        | 0.842        | 0.849       | 0.771        | 0.821        | 0.825        | 0.828        |
| PPITF 1layer 696+100              | 0.839        | 0.855        | 0.846       | 0.745        | 0.811        | 0.812        | 0.818        |
| PPITF 2layer 696+100/100          | 0.854        | 0.85         | 0.851       | 0.767        | 0.824        | 0.824        | 0.828        |
| Dense 1layer 100 pretrain         | 0.858        | 0.845        | 0.851       | 0.775        | 0.827        | 0.829        | 0.831        |
| Dense 1layer 796 pretrain         | 0.848        | 0.839        | 0.843       | 0.759        | 0.817        | 0.819        | 0.821        |
| Dense 2layer 796/100 pretrain     | 0.846        | 0.839        | 0.842       | 0.756        | 0.815        | 0.815        | 0.819        |
| PPITF 1layer 696+100 pretrain     | 0.835        | 0.845        | 0.839       | 0.763        | 0.809        | 0.823        | 0.819        |
| PPITF 2layer 696+100/100 pretrain | 0.849        | 0.831        | 0.839       | 0.762        | 0.812        | 0.817        | 0.818        |

Supplementary Table 5: Average clustering performance of different scoring metrics with 8 cell types in testing set for 20 clustering experiments (using different random initialization. Homo: homogeneity, Comp: Completeness, Vmes: v-measure, ARI: adjusted random index, AMI: adjusted mutual information, FM: Fowlkes-Mallows

| Feature                           | Homo         | Comp         | Vmes        | ARI          | AMI          | FM           | Averagge     |
|-----------------------------------|--------------|--------------|-------------|--------------|--------------|--------------|--------------|
| original                          | 0.701        | 0.883        | 0.777       | 0.55         | 0.68         | 0.683        | 0.712        |
| pca 2                             | 0.792        | 0.84         | 0.815       | 0.686        | 0.772        | 0.754        | 0.776        |
| tsne 2                            | 0.257        | 0.246        | 0.251       | 0.131        | 0.19         | 0.275        | 0.225        |
| ica 2                             | 0.787        | 0.84         | 0.812       | 0.679        | 0.766        | 0.751        | 0.772        |
| nmf 2                             | 0.553        | 0.651        | 0.596       | 0.383        | 0.521        | 0.524        | 0.538        |
| pca 5                             | 0.814        | 0.893        | <b>0.85</b> | 0.701        | 0.793        | <b>0.774</b> | 0.804        |
| tsne 5                            | 0.053        | 0.06         | 0.056       | -0.005       | -0.008       | 0.193        | 0.058        |
| ica 5                             | 0.808        | 0.884        | 0.843       | 0.692        | 0.789        | 0.764        | 0.797        |
| nmf 5                             | 0.675        | 0.771        | 0.715       | 0.538        | 0.647        | 0.649        | 0.666        |
| pca 10                            | 0.758        | 0.889        | 0.816       | 0.627        | 0.741        | 0.725        | 0.759        |
| tsne 10                           | 0.073        | 0.066        | 0.069       | -0.001       | -0.003       | 0.153        | 0.06         |
| ica 10                            | 0.686        | 0.853        | 0.759       | 0.55         | 0.664        | 0.675        | 0.698        |
| nmf 10                            | 0.704        | 0.816        | 0.753       | 0.599        | 0.683        | 0.694        | 0.708        |
| pca 50                            | 0.757        | 0.882        | 0.812       | 0.622        | 0.736        | 0.722        | 0.755        |
| nmf 50                            | 0.588        | 0.736        | 0.651       | 0.484        | 0.563        | 0.612        | 0.606        |
| pca 100                           | 0.74         | 0.887        | 0.805       | 0.609        | 0.719        | 0.716        | 0.746        |
| nmf 100                           | 0.516        | 0.676        | 0.582       | 0.388        | 0.486        | 0.545        | 0.532        |
| pcaReduce                         | 0.779        | 0.861        | 0.817       | 0.681        | 0.763        | 0.751        | 0.776        |
| SIMLR_20                          | 0.763        | 0.759        | 0.759       | 0.58         | 0.717        | 0.662        | 0.707        |
| SIMLR_30                          | 0.79         | 0.786        | 0.788       | 0.634        | 0.753        | 0.703        | 0.742        |
| SIMLR_40                          | 0.766        | 0.77         | 0.767       | 0.594        | 0.73         | 0.671        | 0.717        |
| SNN-Cliq                          | 0.546        | 0.893        | 0.668       | 0.435        | 0.53         | 0.618        | 0.615        |
| sincera_hc                        | 0.739        | <b>0.929</b> | 0.821       | 0.674        | 0.723        | 0.766        | 0.775        |
| Dense 1layer 100                  | 0.816        | 0.799        | 0.806       | 0.658        | 0.77         | 0.722        | 0.762        |
| Dense 1layer 796                  | <b>0.841</b> | 0.852        | 0.846       | <b>0.718</b> | <b>0.813</b> | 0.774        | <b>0.807</b> |
| Dense 2layer 796/100              | 0.819        | 0.801        | 0.809       | 0.659        | 0.771        | 0.722        | 0.763        |
| PPITF 1layer 696+100              | 0.823        | 0.854        | 0.837       | 0.693        | 0.793        | 0.758        | 0.793        |
| PPITF 2layer 696+100/100          | 0.821        | 0.807        | 0.813       | 0.668        | 0.778        | 0.73         | 0.77         |
| Dense 1layer 100 pretrain         | 0.839        | 0.817        | 0.827       | 0.677        | 0.792        | 0.737        | 0.782        |
| Dense 1layer 796 pretrain         | 0.826        | 0.83         | 0.827       | 0.694        | 0.794        | 0.754        | 0.788        |
| Dense 2layer 796/100 pretrain     | 0.809        | 0.815        | 0.811       | 0.657        | 0.773        | 0.724        | 0.765        |
| PPITF 1layer 696+100 pretrain     | 0.83         | 0.866        | 0.846       | 0.706        | 0.806        | 0.769        | 0.804        |
| PPITF 2layer 696+100/100 pretrain | 0.839        | 0.821        | 0.829       | 0.693        | 0.797        | 0.75         | 0.788        |

Supplementary Table 6: Mean performance of different scoring metrics with mean clustering performance for all number of cell types for 20 clustering experiments (using random subsets). Homo: homogeneity, Comp: Completeness, Vmes: v-measure, ARI: adjusted random index, AMI: adjusted mutual information, FM: Fowlkes-Mallows

| Feature                           | Homo        | Comp         | Vmes         | ARI          | AMI          | FM           | Average      |
|-----------------------------------|-------------|--------------|--------------|--------------|--------------|--------------|--------------|
| original                          | 0.775       | 0.882        | 0.819        | 0.698        | 0.761        | 0.811        | 0.791        |
| pca 2                             | 0.85        | 0.881        | 0.863        | 0.793        | 0.836        | 0.857        | 0.847        |
| tsne 2                            | 0.176       | 0.166        | 0.17         | 0.098        | 0.124        | 0.394        | 0.188        |
| ica 2                             | 0.806       | 0.841        | 0.821        | 0.75         | 0.791        | 0.85         | 0.81         |
| nmf 2                             | 0.614       | 0.685        | 0.644        | 0.52         | 0.588        | 0.698        | 0.625        |
| pca 5                             | 0.815       | 0.896        | 0.85         | 0.746        | 0.802        | 0.833        | 0.824        |
| tsne 5                            | 0.048       | 0.051        | 0.048        | -0.0         | 0.002        | 0.342        | 0.082        |
| ica 5                             | 0.692       | 0.798        | 0.736        | 0.626        | 0.678        | 0.797        | 0.721        |
| nmf 5                             | 0.697       | 0.786        | 0.732        | 0.64         | 0.675        | 0.78         | 0.718        |
| pca 10                            | 0.79        | 0.89         | 0.833        | 0.714        | 0.779        | 0.82         | 0.804        |
| tsne 10                           | 0.052       | 0.046        | 0.049        | -0.003       | 0.001        | 0.303        | 0.075        |
| ica 10                            | 0.499       | 0.68         | 0.562        | 0.434        | 0.48         | 0.729        | 0.564        |
| nmf 10                            | 0.684       | 0.76         | 0.712        | 0.623        | 0.657        | 0.78         | 0.703        |
| pca 50                            | 0.771       | 0.876        | 0.815        | 0.7          | 0.757        | 0.813        | 0.789        |
| nmf 50                            | 0.489       | 0.617        | 0.538        | 0.427        | 0.466        | 0.691        | 0.538        |
| pca 100                           | 0.77        | 0.887        | 0.817        | 0.702        | 0.756        | 0.817        | 0.791        |
| nmf 100                           | 0.426       | 0.576        | 0.478        | 0.356        | 0.399        | 0.651        | 0.481        |
| pcaReduce                         | 0.782       | 0.855        | 0.814        | 0.731        | 0.77         | 0.835        | 0.798        |
| SIMLR_20                          | 0.81        | 0.806        | 0.807        | 0.704        | 0.779        | 0.786        | 0.782        |
| SIMLR_30                          | 0.81        | 0.816        | 0.811        | 0.726        | 0.78         | 0.811        | 0.792        |
| SIMLR_40                          | 0.803       | 0.803        | 0.801        | 0.697        | 0.77         | 0.791        | 0.778        |
| SNN-Cliq                          | 0.671       | 0.898        | 0.752        | 0.604        | 0.652        | 0.744        | 0.72         |
| sincera_hc                        | 0.822       | <b>0.937</b> | 0.87         | 0.797        | 0.809        | 0.868        | 0.851        |
| Dense 1layer 100                  | 0.885       | 0.876        | 0.88         | 0.819        | 0.858        | 0.864        | 0.864        |
| Dense 1layer 796                  | 0.883       | 0.883        | 0.882        | 0.824        | 0.862        | <b>0.873</b> | <b>0.868</b> |
| Dense 2layer 796/100              | 0.882       | 0.868        | 0.875        | 0.815        | 0.852        | 0.861        | 0.859        |
| PPITF 1layer 696+100              | 0.879       | 0.887        | 0.882        | 0.818        | 0.857        | 0.868        | 0.865        |
| PPITF 2layer 696+100/100          | 0.889       | 0.881        | <b>0.885</b> | 0.823        | <b>0.864</b> | 0.867        | 0.868        |
| Dense 1layer 100 pretrain         | 0.879       | 0.863        | 0.87         | 0.806        | 0.848        | 0.859        | 0.854        |
| Dense 1layer 796 pretrain         | 0.874       | 0.868        | 0.87         | 0.809        | 0.849        | 0.861        | 0.855        |
| Dense 2layer 796/100 pretrain     | 0.877       | 0.873        | 0.874        | 0.808        | 0.853        | 0.857        | 0.857        |
| PPITF 1layer 696+100 pretrain     | 0.87        | 0.879        | 0.873        | 0.81         | 0.849        | 0.864        | 0.858        |
| PPITF 2layer 696+100/100 pretrain | <b>0.89</b> | 0.877        | 0.883        | <b>0.826</b> | 0.862        | 0.869        | 0.868        |

Supplementary Table 9: The average testing performance of NN training with different parameter settings of SGD

| parameter setting                              | accuracy | loss   |
|------------------------------------------------|----------|--------|
| learning rate: 0.01 momentum: 0.5 decay: 0.001 | 0.925    | 0.355  |
| learning rate: 0.01 momentum: 0.5 decay: 1e-06 | 0.925    | 0.3399 |
| learning rate: 0.01 momentum: 0.9 decay: 0.001 | 0.925    | 0.355  |
| learning rate: 0.01 momentum: 0.9 decay: 1e-06 | 0.925    | 0.3399 |
| learning rate: 0.1 momentum: 0.5 decay: 0.001  | 0.95     | 0.3509 |
| learning rate: 0.1 momentum: 0.5 decay: 1e-06  | 0.95     | 0.3396 |
| learning rate: 0.1 momentum: 0.9 decay: 0.001  | 0.95     | 0.3509 |
| learning rate: 0.1 momentum: 0.9 decay: 1e-06  | 0.95     | 0.3396 |

Supplementary Table 7: Average ratio of mean absolute error compared to 0 drop-out rate

| missing rate | drop-out rate | ratio of mean absolute error |
|--------------|---------------|------------------------------|
| 0.05         | 0             | 1                            |
| 0.05         | 0.01          | 0.999                        |
| 0.05         | 0.03          | 1.015                        |
| 0.05         | 0.05          | 1.029                        |
| 0.1          | 0             | 1                            |
| 0.1          | 0.01          | 1.005                        |
| 0.1          | 0.03          | 1.019                        |
| 0.1          | 0.05          | 1.034                        |

Note that the ratio is compared to the 0 drop-out rate with the same missing rate. This experiment shows that applying drop-out after imputation does not improve the performance (reduce the mean absolute error) and yields similar results.

Supplementary Table 8: The cell types of the datasets used in training and clustering experiment

|                                            |
|--------------------------------------------|
| BMDC (Bone Marrow-derived Dendritic Cells) |
| ES (embryonic stem cells)                  |
| PrE (primitive endoderm)                   |
| late2cell                                  |
| earlyblast                                 |
| midblast                                   |
| 8cell                                      |
| 4cell                                      |
| 16cell                                     |
| mid2cell                                   |
| lateblast                                  |
| zygote                                     |
| 2cell                                      |
| fibroblast                                 |
| C57 2cell                                  |
| BXC (liver cells )                         |

Supplementary Table 10: The p-value comparison of some examples of highly ranked GO function for some of the cell types found both by deeplift and our method

| Cell type  | GO function                                  | p-value of DeepLift | p-value of our method |
|------------|----------------------------------------------|---------------------|-----------------------|
| ES         | Factor: E2F-3;                               | 1.31E-06            | 4.44E-15              |
| ES         | Factor: IRF6;                                | 1.65E-02            | 5.78E-12              |
| BDMCs      | immune system process                        | 5.10E-12            | 1.56E-05              |
| BDMCs      | positive regulation of immune system process | 5.91E-09            | 1.59E-11              |
| BDMCs      | response to cytokine                         | 1.63E-03            | 2.06E-06              |
| fibroblast | Focal adhesion                               | -                   | 3.16E-06              |
| fibroblast | acetyltransferase complex                    | -                   | 2.85E-20              |
| zygote     | regulation of cell proliferation             | -                   | 6.85E-07              |
| zygote     | cell junction                                | -                   | 7.36E-09              |
| zygote     | TF: foxd3                                    | -                   | significant           |

Supplementary Table 11: Significant gene list and repeat counts for pretrained model (100 dense nodes)

|         |    |          |   |        |   |         |   |          |   |        |   |
|---------|----|----------|---|--------|---|---------|---|----------|---|--------|---|
| rpl27a  | 36 | rpl23a   | 4 | srsf7  | 3 | rplp2   | 2 | rps17    | 1 | rplp1  | 1 |
| rps12   | 24 | rplp0    | 4 | eef1b2 | 3 | klhl7   | 2 | s100a6   | 1 | laptm5 | 1 |
| rpl37a  | 21 | rpsa     | 4 | arpc1b | 2 | ccdc78  | 2 | psmb8    | 1 | lgals1 | 1 |
| rpl15   | 12 | cox7c    | 4 | bard1  | 2 | ncl     | 2 | rpl26    | 1 | mapt   | 1 |
| rpl711  | 9  | rps24    | 4 | rps16  | 2 | aak1    | 1 | atp5b    | 1 | mpv17l | 1 |
| lox12   | 9  | rps14    | 4 | calm1  | 2 | rps19   | 1 | cd47     | 1 | mrpl43 | 1 |
| pwwp2a  | 6  | rab3a    | 4 | polr2l | 2 | rps29   | 1 | coro1a   | 1 | naca   | 1 |
| ankfy1  | 6  | stmn3    | 4 | rps11  | 2 | rrm2    | 1 | cp       | 1 | nsf    | 1 |
| uba52   | 6  | rps4x    | 4 | rpl28  | 2 | sec62   | 1 | ddx5     | 1 | pfn1   | 1 |
| serinc1 | 6  | ppia     | 3 | itm2b  | 2 | serinc3 | 1 | eif3f    | 1 | prex2  | 1 |
| slc25a4 | 5  | kif5c    | 3 | rpl36  | 2 | shc2    | 1 | eno2     | 1 | psat1  | 1 |
| cd3eap  | 5  | hsp90ab1 | 3 | rpl18  | 2 | sub1    | 1 | gsn      | 1 | rac2   | 1 |
| app     | 5  | rpl10    | 3 | rpl34  | 2 | syt1    | 1 | hsp90aa1 | 1 | rpl10a | 1 |
| fau     | 5  | arhgdib  | 3 | cpm    | 2 | tecr    | 1 | hspe1    | 1 | ldha   | 1 |
| exosc2  | 5  | rpl4     | 3 | gapdh  | 2 | trim28  | 1 | igf2bp1  | 1 | wnk1   | 1 |
| slc25a5 | 5  |          |   |        |   |         |   |          |   |        |   |



Supplementary Table 12: GO analysis results for the significant genes in pretrain models (top 50 results by p-value)

| <b>p_value</b> | <b>term_id</b> | <b>description</b>                           |
|----------------|----------------|----------------------------------------------|
| 6.77E-32       | GO:0003735     | structural constituent of ribosome           |
| 6.68E-30       | GO:0005840     | ribosome                                     |
| 7.36E-30       | KEGG:03010     | Ribosome                                     |
| 1.87E-29       | GO:0022626     | cytosolic ribosome                           |
| 5.45E-26       | GO:0044445     | cytosolic part                               |
| 1.87E-25       | GO:0044391     | ribosomal subunit                            |
| 1.42E-24       | GO:0006412     | translation                                  |
| 4.01E-24       | GO:0043043     | peptide biosynthetic process                 |
| 1.49E-23       | GO:0030529     | intracellular ribonucleoprotein complex      |
| 1.55E-23       | GO:1990904     | ribonucleoprotein complex                    |
| 7.69E-23       | GO:0006518     | peptide metabolic process                    |
| 1.93E-22       | GO:0043604     | amide biosynthetic process                   |
| 3.34E-21       | GO:0003723     | RNA binding                                  |
| 1.87E-20       | GO:0043603     | cellular amide metabolic process             |
| 2.65E-20       | GO:0005829     | cytosol                                      |
| 3.33E-19       | GO:0005198     | structural molecule activity                 |
| 1.35E-18       | GO:0044444     | cytoplasmic part                             |
| 3.69E-18       | GO:1903561     | extracellular vesicle                        |
| 4.07E-18       | GO:0043230     | extracellular organelle                      |
| 5.80E-18       | GO:0022625     | cytosolic large ribosomal subunit            |
| 2.41E-17       | GO:0070062     | extracellular exosome                        |
| 2.76E-17       | GO:1901566     | organonitrogen compound biosynthetic process |
| 9.21E-17       | GO:0044822     | poly(A) RNA binding                          |
| 5.12E-16       | GO:0043232     | intracellular non-membrane-bounded organelle |
| 5.12E-16       | GO:0043228     | non-membrane-bounded organelle               |
| 1.44E-15       | GO:1901564     | organonitrogen compound metabolic process    |
| 5.05E-15       | GO:0032991     | macromolecular complex                       |
| 6.74E-15       | GO:0015934     | large ribosomal subunit                      |
| 8.28E-15       | GO:0005737     | cytoplasm                                    |
| 2.44E-13       | GO:0031982     | vesicle                                      |
| 4.82E-13       | GO:0043226     | organelle                                    |
| 2.04E-12       | GO:0044421     | extracellular region part                    |
| 5.77E-12       | GO:0005622     | intracellular                                |
| 2.29E-11       | GO:0044424     | intracellular part                           |
| 2.49E-11       | GO:0043229     | intracellular organelle                      |
| 7.85E-11       | GO:0005925     | focal adhesion                               |
| 8.98E-11       | GO:0005924     | cell-substrate adherens junction             |
| 1.12E-10       | GO:0030055     | cell-substrate junction                      |
| 1.34E-10       | GO:0005912     | adherens junction                            |
| 2.06E-10       | GO:0044422     | organelle part                               |
| 2.16E-10       | GO:0070161     | anchoring junction                           |
| 2.52E-10       | GO:0044446     | intracellular organelle part                 |
| 5.96E-10       | GO:0005576     | extracellular region                         |
| 1.17E-09       | GO:0022627     | cytosolic small ribosomal subunit            |
| 9.13E-09       | GO:0003676     | nucleic acid binding                         |
| 1.92E-08       | HP:0012133     | Erythroid hypoplasia                         |
| 3.62E-08       | GO:0043227     | membrane-bounded organelle                   |
| 9.01E-08       | GO:0015935     | small ribosomal subunit                      |
| 1.32E-07       | GO:1901363     | heterocyclic compound binding                |
| 1.98E-07       | GO:0042254     | ribosome biogenesis                          |

### 3 Supplementary Figures

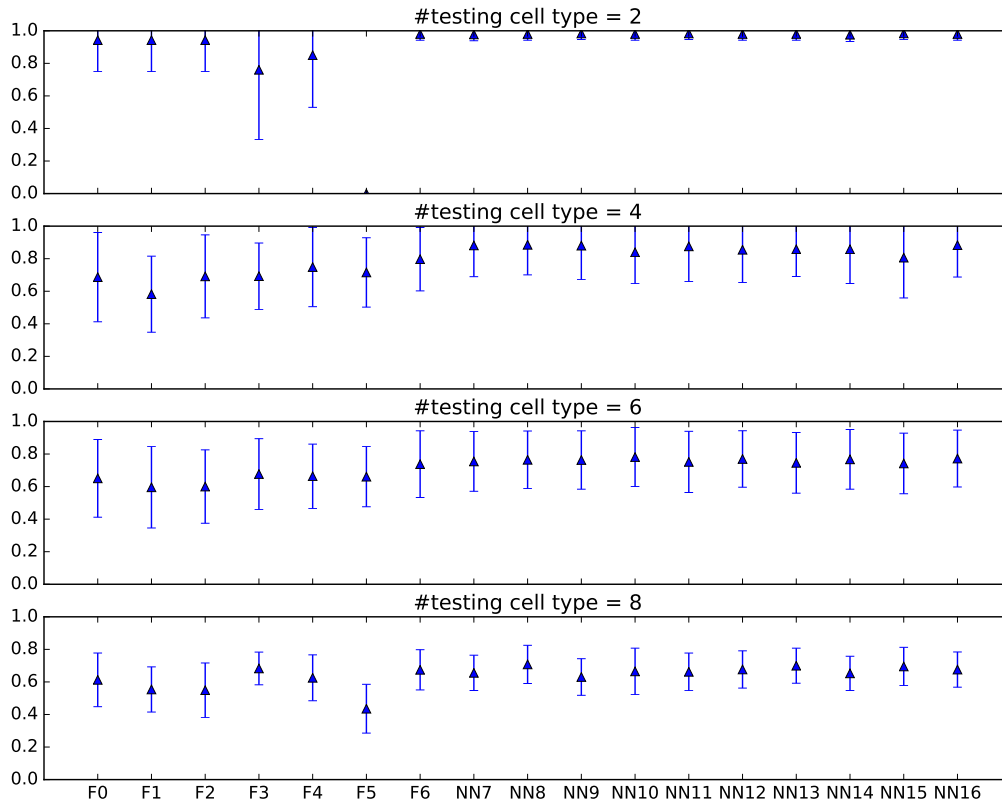

Supplementary Figure 1: The mean and standard error of ARI for some of the clustering results presented in Table 2 of the main paper and in Supplementary Table 3-6). See Supporting Table 13 below for methods represented by F0-F6 and NN7-NN16.

Supplementary Table 13: Abbreviations used for Supporting Figures 1 and 2

|      |                                   |
|------|-----------------------------------|
| F0   | original                          |
| F1   | PCA 100                           |
| F2   | PCA 796                           |
| F3   | pcaReduce                         |
| F4   | SIMLR                             |
| F5   | SNN-Cliq                          |
| F6   | SINCERA hierarchical clustering   |
| NN7  | Dense 1layer 100                  |
| NN8  | Dense 1layer 796                  |
| NN9  | Dense 2layer 796/100              |
| NN10 | PPITF 1layer 696+100              |
| NN11 | PPITF 2layer 696+100/100          |
| NN12 | Dense 1layer 100 pretrain         |
| NN13 | Dense 1layer 796 pretrain         |
| NN14 | Dense 2layer 796/100 pretrain     |
| NN15 | PPITF 1layer 696+100 pretrain     |
| NN16 | PPITF 2layer 696+100/100 pretrain |

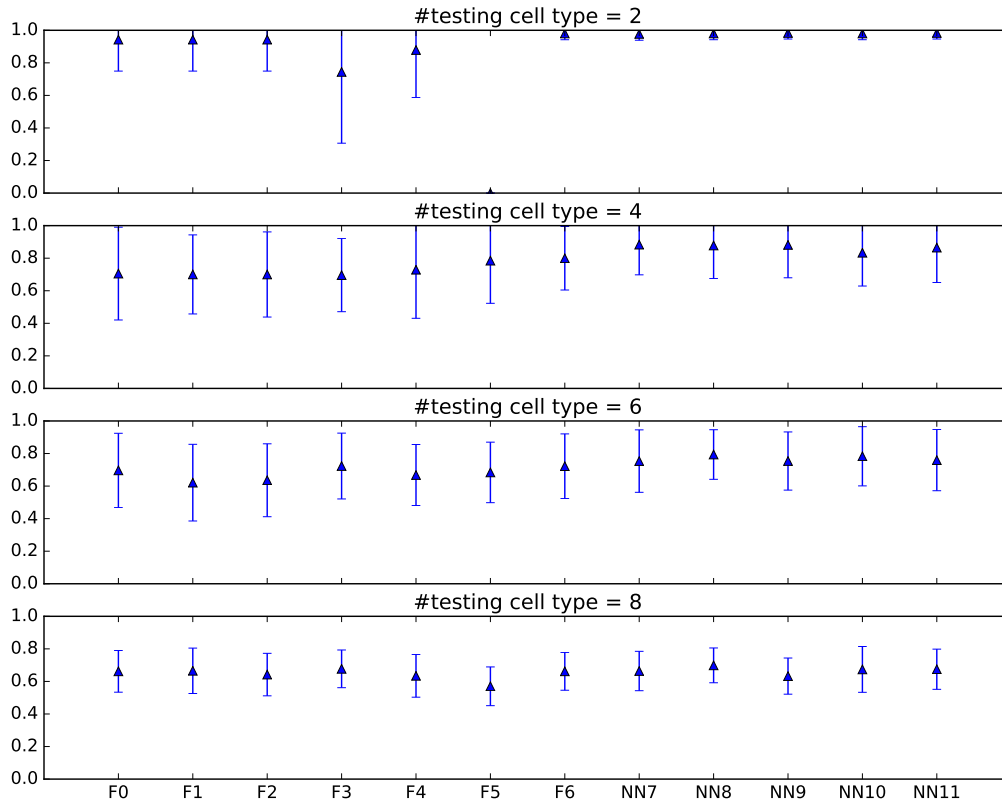

Supplementary Figure 2: The same experiment of Supplementary Figure 1 with data normalized. The results are similar.

(a) dense accuracy

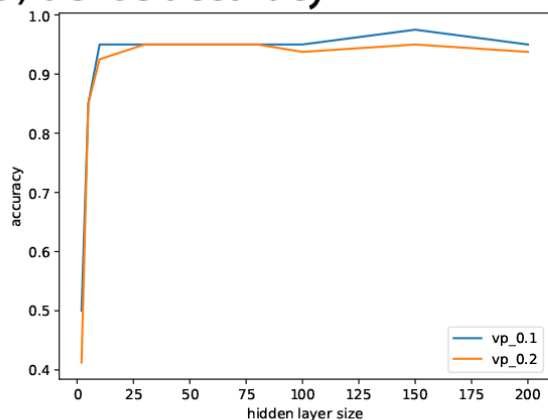

(b) dense loss

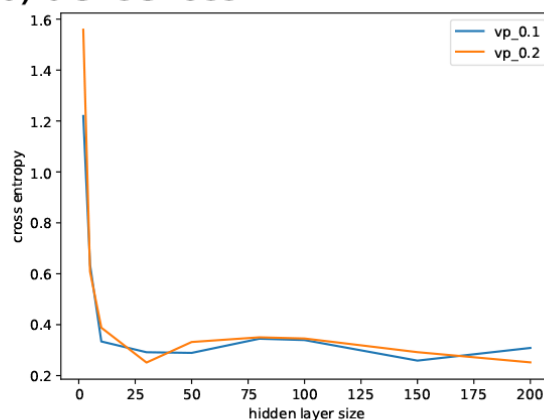

(c) PPI/TF accuracy

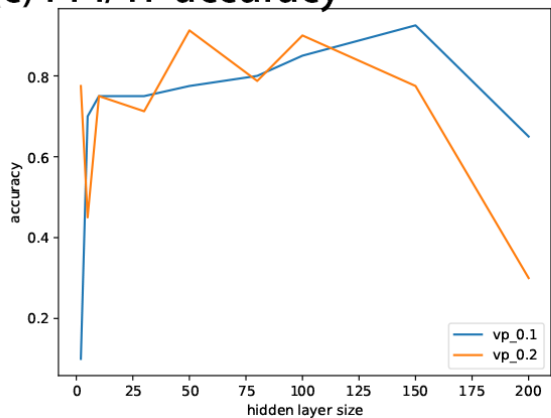

(d) PPI/TF loss

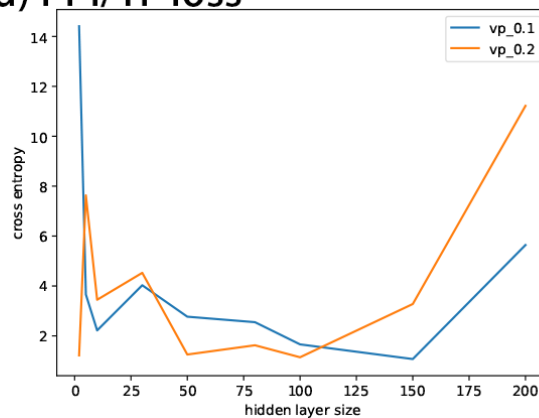

Supplementary Figure 3: Average test performance for 10 random train / test splits of NN for various architectures and number of internal nodes. We tested the following number for the dense layer: 2, 5, 10, 30, 50, 80, 100, 150 and 200. VP is the percentage of cells left for testing. (a) Accuracy of a single dense layer (b) Cross entropy loss for that architecture (c) Accuracy for changing the number of nodes in the dense layer of the PPI/TF model (d) Cross entropy for that model

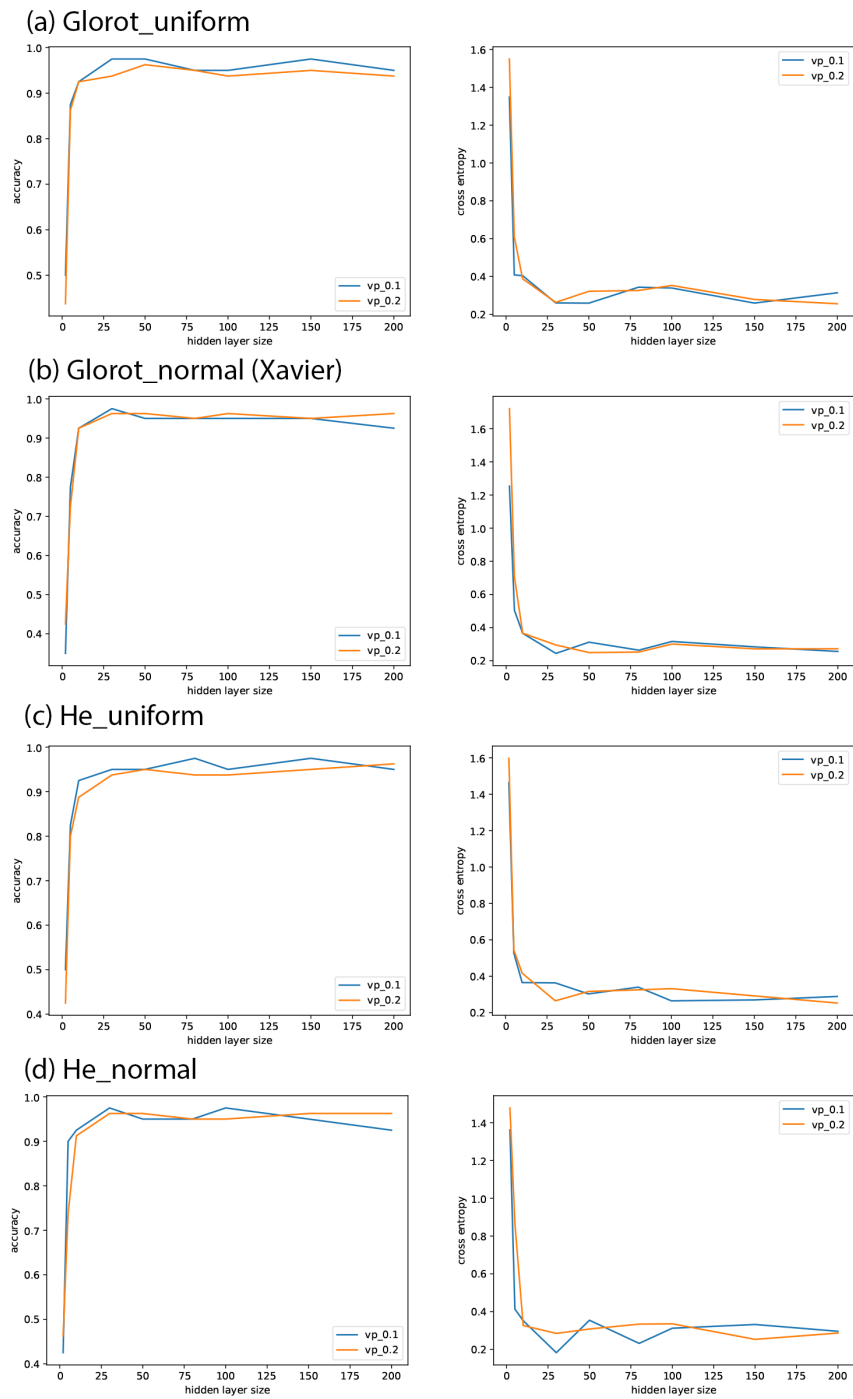

Supplementary Figure 4: Average testing performance for 10 random train / test splits of NN for various initialization methods. VP is the percentage of cells left for testing. (a) Accuracy and loss of glorot uniform initialization (which is the method used in the paper) (b) Accuracy and loss of glorot normal (Xavier) initialization (c) Accuracy and loss of uniform He initialization (d) Accuracy and loss of normal He initialization

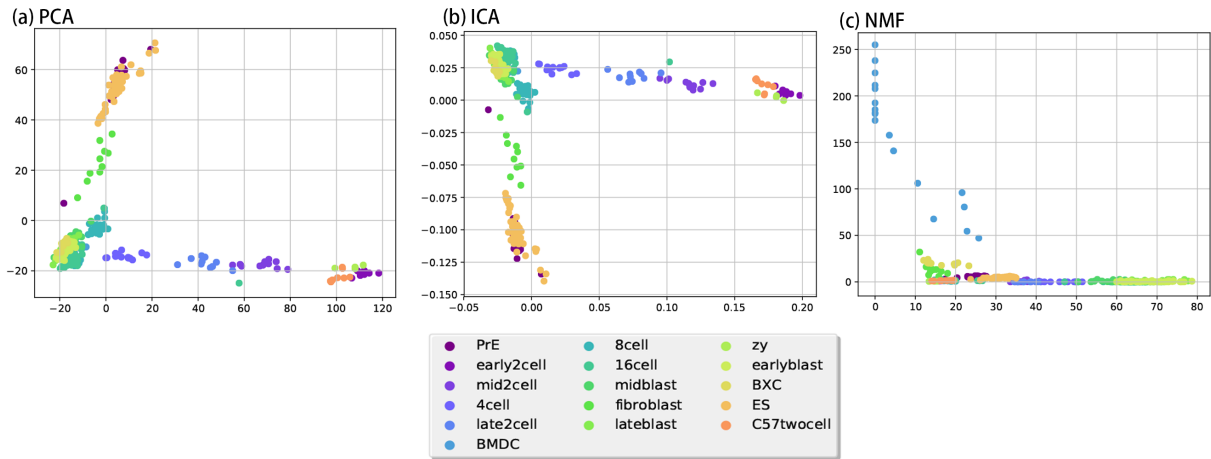

Supplementary Figure 5: The 2D visualization of reduced dimensions. Other figures are in supplementary. (a) 2D TSNE visualization of original data (b) 2D PCA visualization of SIMLR-transformed data (c) 2D TSNE visualization of the transformed data by 2 layer PPI/TF NN (d) 2D PCA visualization of the transformed data by 2 layer PPI/TF NN
